# Supplementary material
Source: publisher site journal article supplement (https://www.kjim.org/upload/media/kjim-2025-037-supplementary-fig-2.pdf)
Supplement: Supplementary file 1 [file kjim-2025-037-supplementary-fig-2.pdf]

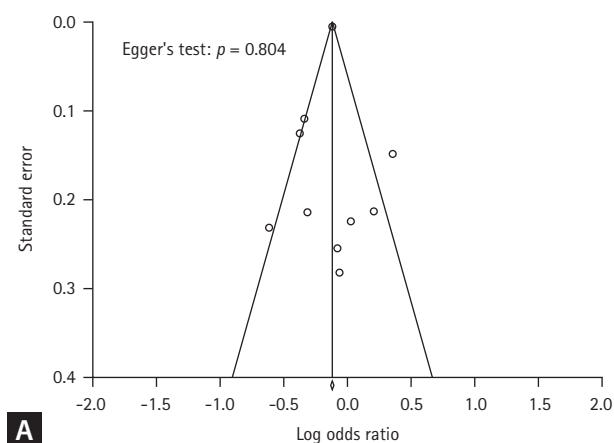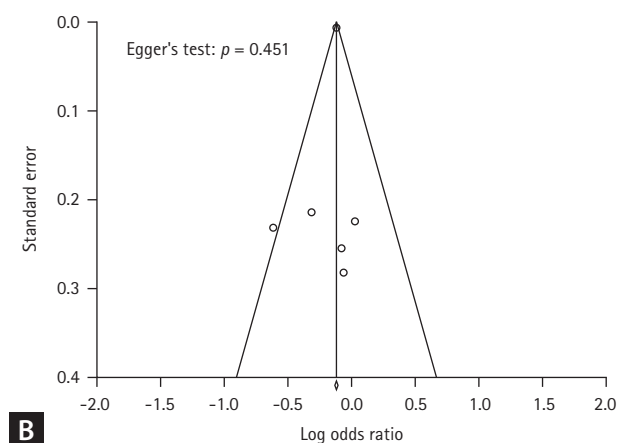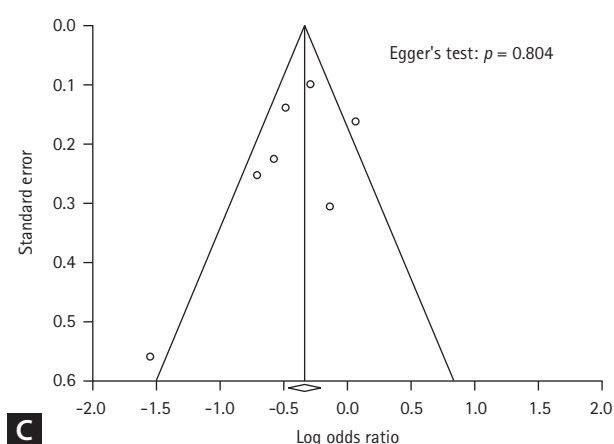

**Supplementary Figure 2.** Funnel plots of included studies. Comparison of mortality and time to antibiotic administration within 1 hour or after 1 hour in patients with (A) sepsis and (B) septic shock. (C) Comparison of mortality and time to antibiotic administration within 3 hours or after 3 hours in patients with sepsis.
